# Supplementary material
Source: MDPI journal article supplement (https://www.mdpi.com/2073-445X/10/7/705)
Supplement: s1 [file s1]

# Spatially Explicit Assessment of Suitable Conditions for the Sustainable Production of Aviation Fuels in Brazil

Arnaldo Walter <sup>1,\*</sup>, Joaquim Seabra <sup>1</sup>, Jansle Rocha <sup>2</sup>, Marjorie Guarengi <sup>1</sup>, Nathália Vieira <sup>1</sup>, Desirée Damame <sup>1</sup> and João Luís Santos <sup>3</sup>

<sup>1</sup> University of Campinas / School of Mechanical Engineering, 200 Mendeleyev, Campinas, 13083-860, Brazil; [jseabra@fem.unicamp.br](mailto:jseabra@fem.unicamp.br) (J.S.); [marjorie@fem.unicamp.br](mailto:marjorie@fem.unicamp.br) (M.G.); [n207376@dac.unicamp.br](mailto:n207376@dac.unicamp.br) (N.V.); [d207375@dac.unicamp.br](mailto:d207375@dac.unicamp.br) (D.D.)

<sup>2</sup> University of Campinas / School of Agricultural Engineering, 501 Candido Rondon, Campinas, 13083-875, Brazil; [jansle@unicamp.br](mailto:jansle@unicamp.br)

<sup>3</sup> GeoMeridium, 777 Jorge Hennings, Campinas, 13070-142, Brazil; [joao.luis@geomeridium.com](mailto:joao.luis@geomeridium.com)

\* Correspondence: [awalter@unicamp.br](mailto:awalter@unicamp.br); Tel.: + 55 19 3521 3283

## Supplementary Material

### 1. Land Prices

In Figure S1 average land prices for natural pasturelands, in R\$ (2018), at municipal level, are presented. The prices were estimated from [1-3].

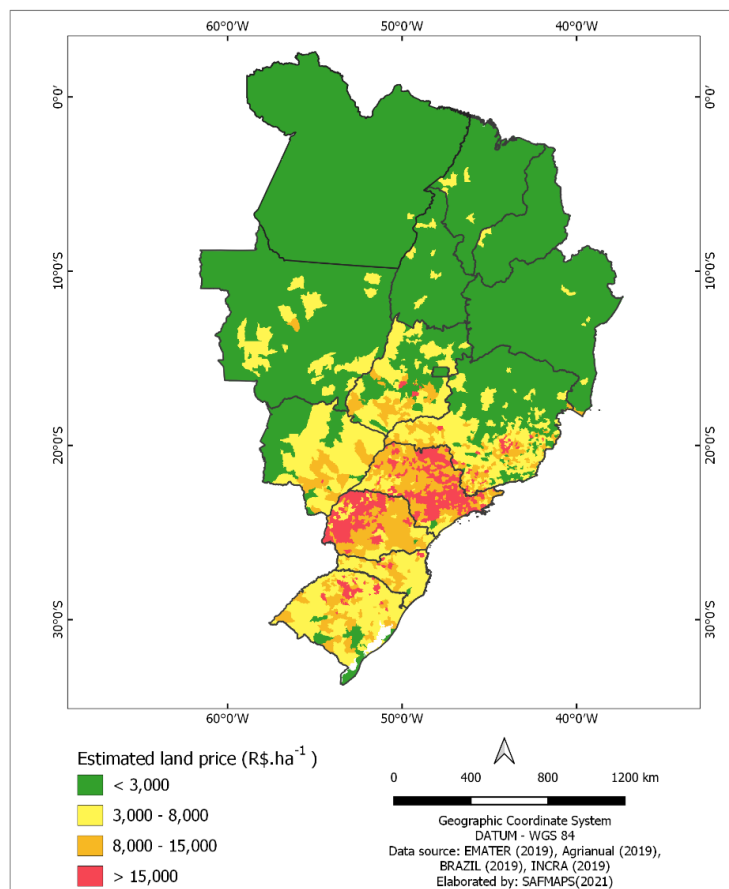

**Figure S1.** Estimated land prices in 2018, for natural pasturelands.

## 2. Legally Protected Areas

Figure S2 shows the location of legally protected areas in Brazil. The category includes three groups: (1) conservation units due to environmental reasons (as for March 2020), (2) traditional Afro-Brazilian settlements in 2020 (i.e. Quilombola areas), and (3) the indigenous reserves (as for 2019).

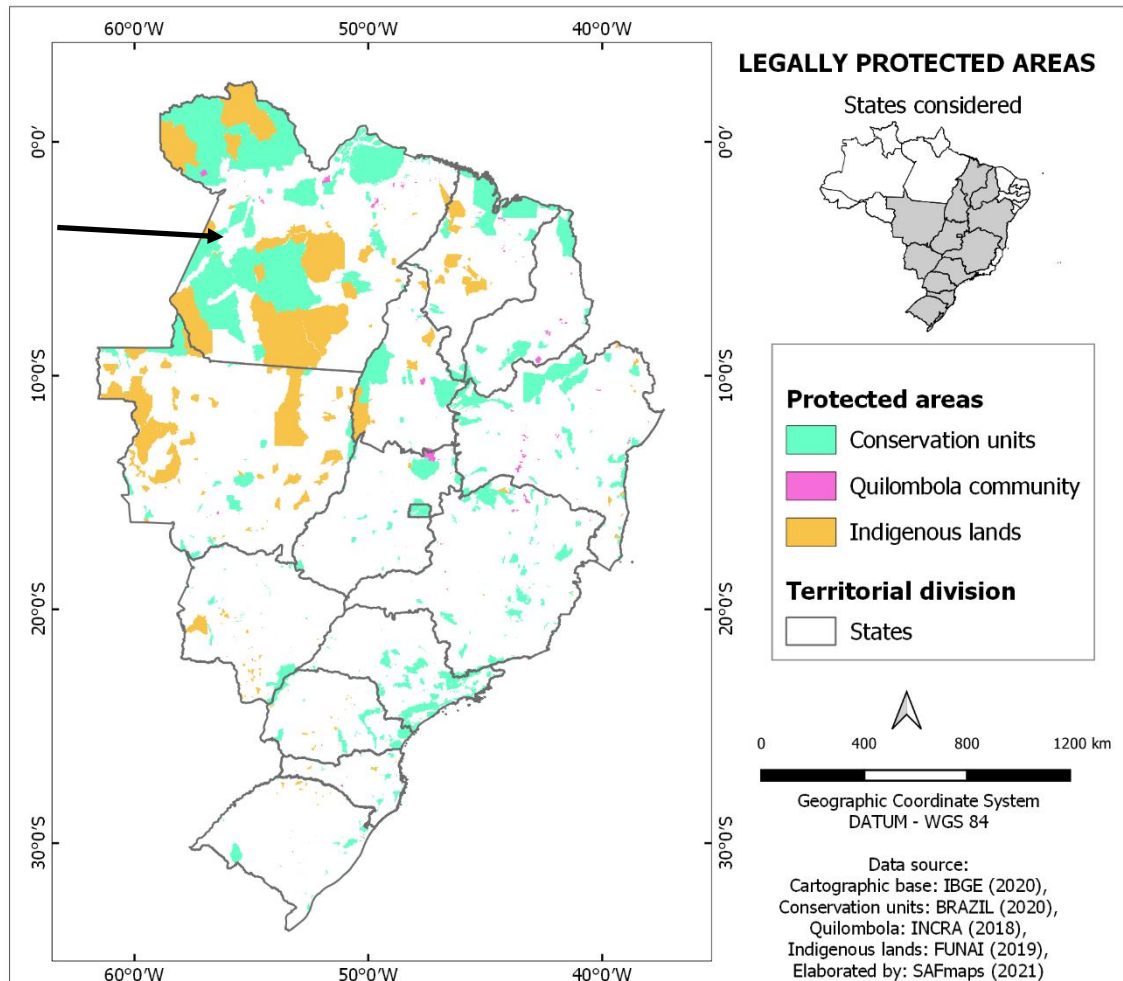

Sources [4-7]

**Figure S2.** Location of legally protected areas in Brazil. The arrow indicates state of Pará.

## 3. Reported Violations to Land Use Rights

Figure S3 illustrates the distribution of reported violations of land use rights, based on [8]. The information corresponds to the period 2016-2018. The reported cases are the number of records in each municipality. Severity is a metric defined by the authors of this study, ranging from 1 to 5, corresponding to 1, for example, threats, and 5 to, for example, homicides reported by [8] in association with disputes over land use and land tenure.

In Figure S3 the states of Pará and Maranhão are highlighted. Maranhão had, in the period 2016-2018, more cases notified, in different municipalities, but in the same period Pará had many more cases classified as serious, mainly in the southeast of the state.

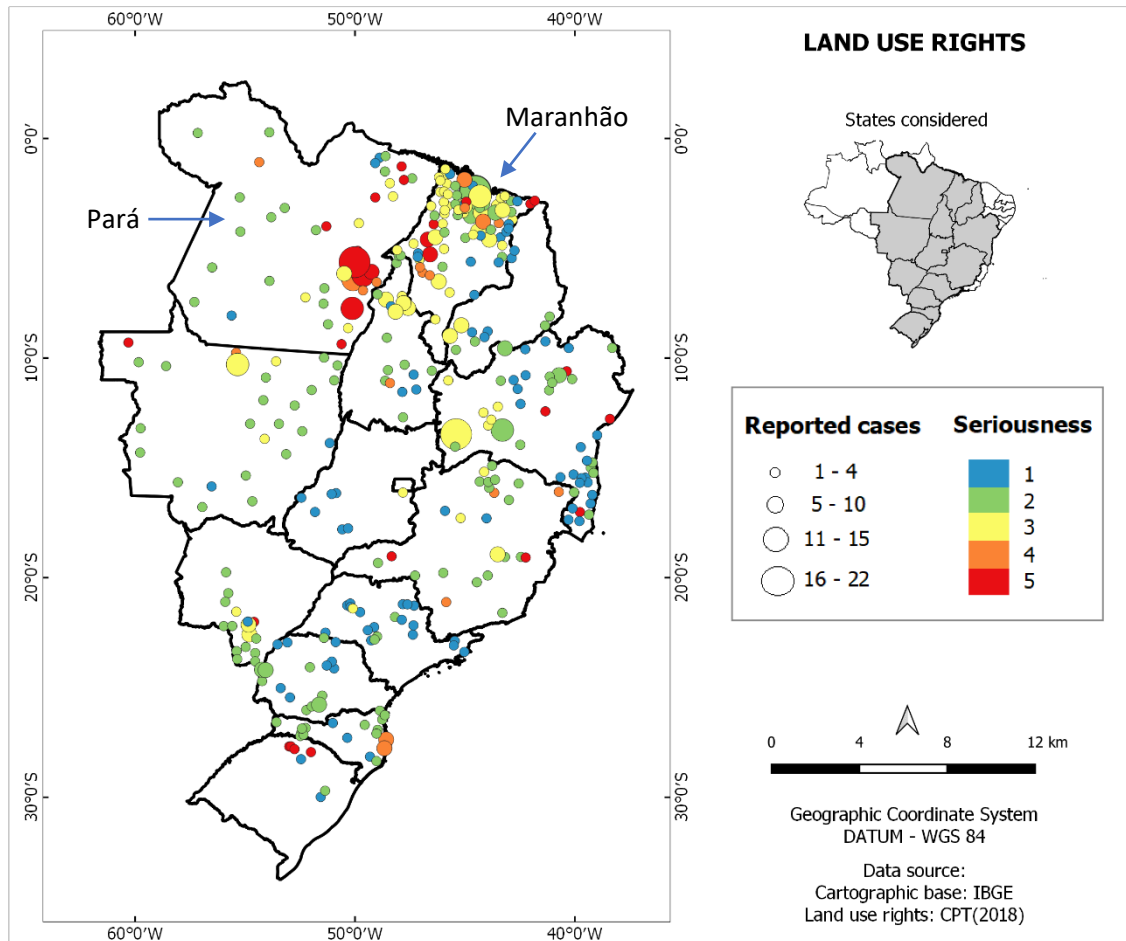

Source [8]

**Figure S3.** Reported violations to land use rights; the states of Pará and Maranhão are highlighted.

#### 4. Maps for Other Crops

Maps, reports and data can be accessed through [www.safmaps.com](http://www.safmaps.com). Moreover, detailed information can be accessed through the following links:

Eucalyptus: <http://dx.doi.org/10.17632/ghvrstw7pw>

Soybean: <http://dx.doi.org/10.17632/jpwggmp9zy>

Sugarcane: <http://dx.doi.org/10.17632/dp4y36fjw5>

Corn: <http://dx.doi.org/10.17632/g25wt3t7k5>

Some maps, available at the database are presented below, as examples.

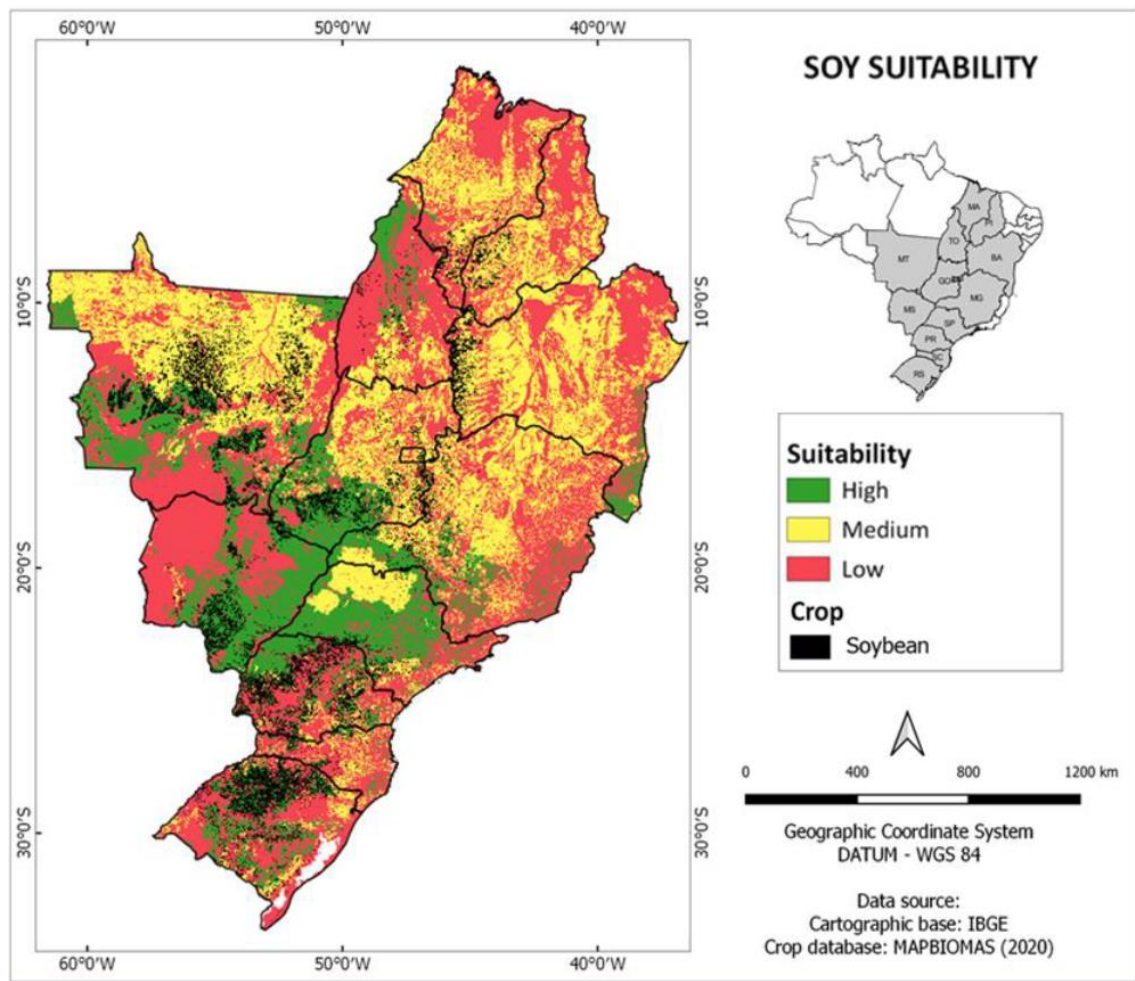

**Figure S4.** Suitability for soybean production, and validation against registers of cropped area in 2018.

The areas cropped with soybean were identified in the map of land use/land cover for 2018 [9]. It was combined with the suitability map, based on the estimates by the authors. In Figure S4 it can be seen that there is good match between the estimated suitability and the results obtained from land use/land cover map.

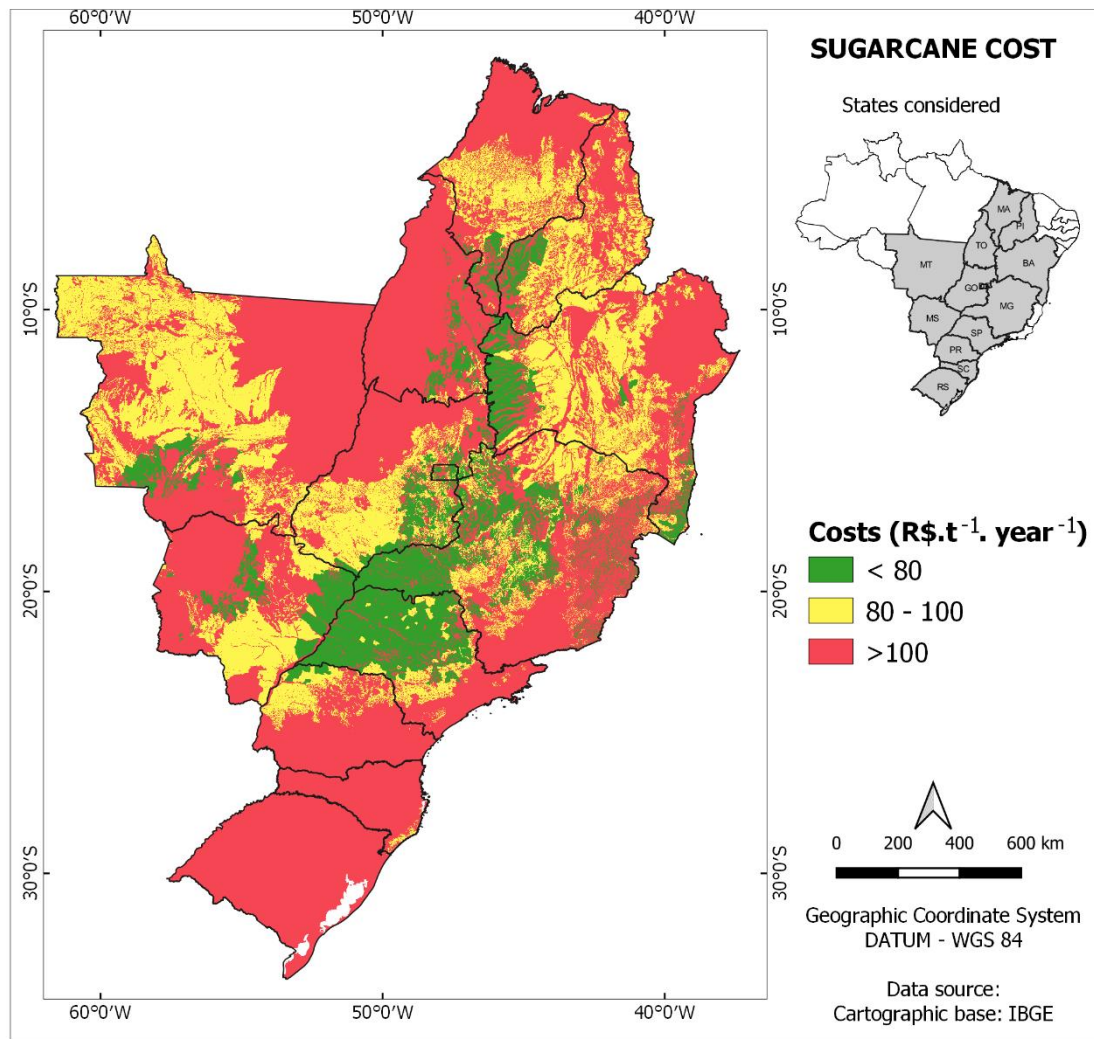

**Figure S5.** Map of estimated average sugarcane costs, including harvesting and transport to the mill, in a five-year cycle.

Figure S5 shows the distribution of estimated average sugarcane production costs. The estimate is based on a producing cycle of five years. The cost structure and reference values were taken from [1], which shows representative data for five states (SP, PR, MG, GO and MS; i.e. the most important producing states).



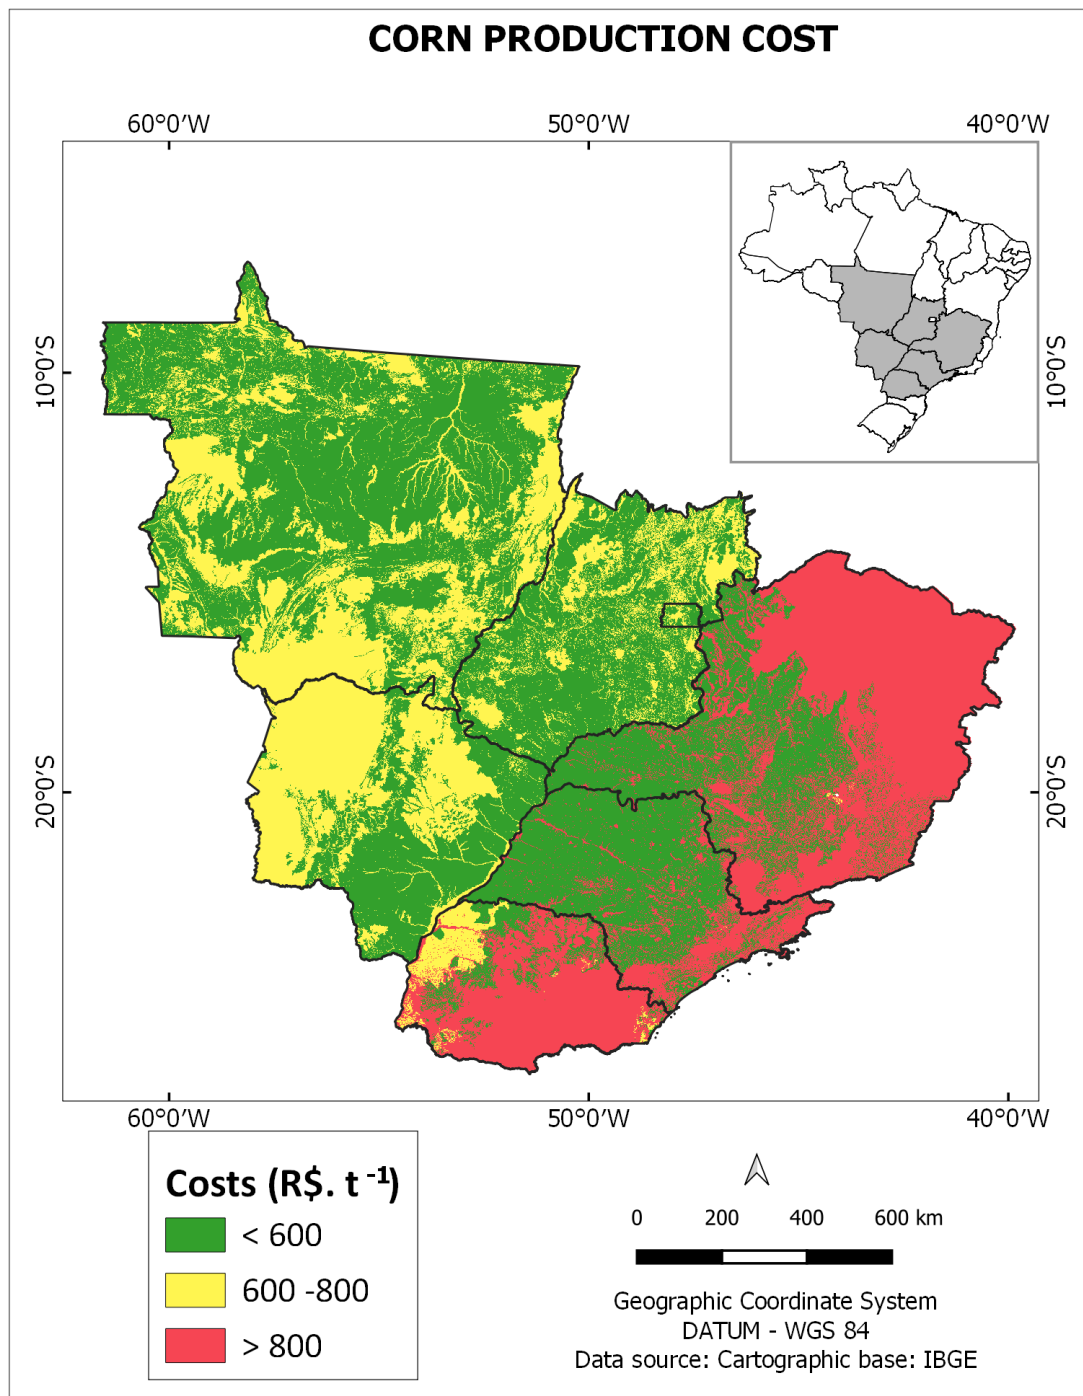

**Figure S6.** Map of estimated average corn costs, as second crop.

Figure S6 shows the estimated production cost of corn as second crop. The distribution is shown in the six states in which there is potential for corn to be produced in association with soybean. The cost estimate is for transgenic corn. Costs include harvesting, transport to nearby warehouses and storage for one month. Thus, costs reflect the availability of corn at an intermediate point between the harvest and the ethanol unit.

Corn costs are estimated according to the cost structure reported by [1] for five states (MT, MS, GO, SP and PR).

## 5. Other Parameters

### 5.1 Heat Content

The assumed heat content of different feedstocks/fuels is presented in the table below.

**Table S1.** Assumed heat content of different fuels.

| Feedstock/Fuel    | LHV (MJ.kg <sup>-1</sup> ) | Comment                              | Reference |
|-------------------|----------------------------|--------------------------------------|-----------|
| Wood (dry)        | 18.07                      |                                      | [10]      |
| Wood (wet)        | 11,29                      | With 60% moisture; to be transported | [10]      |
| Soy oil           | 35.96                      |                                      | [11]      |
| Anhydrous ethanol | 28.24                      |                                      | [12]      |
| Jet-fuel          | 42.80                      |                                      | [12]      |

### 5.2 Cost of Transport

The cost of transport of wood (in BRL.t<sup>-1</sup>.km<sup>-1</sup>) (2018) is calculated by equation (1), which has been adjusted for different estimates presented by [13]. The values obtained with this function are equivalent to those presented by [14], in BRL.m<sup>-3</sup>.km<sup>-1</sup>, for distances between 100 and 140 km, using trucks with a transport capacity of 54 t.

The values obtained by equation (1) were checked with transport costs for different loads, and proved to be adequate. Thus, the function was used for different feedstocks.

$$K = 1.3322 \cdot D^{-0.3076} \quad (1)$$

Where K is the cost (BRL.t<sup>-1</sup>.km<sup>-1</sup>) and D is the distance (km).

Vassalo [15] states that the transport of liquids by pipeline is 4.5 to 5.7 times cheaper (in \$.t<sup>-1</sup>.km<sup>-1</sup>) than the transport by trucks. Here it was used 5.1 for estimating the costs due to the use of pipelines.

From the literature review [16-18], it was observed that the cost ratio of rail/road freight, expressed in US\$.t<sup>-1</sup>.km<sup>-1</sup>, varies between 0.31 and 0.74 for distances greater than 1,000 km, with a clearer indication that 0.50 could be used for a preliminary assessment. Here, 0.50 was used.

## References

1. Agrianual Databe on Agribusiness. Available online: <http://www.agrianual.com.br/> (accessed on 12 March 2020).
2. Valor da Terra Nua. EMATER – Empresa de Assistência Técnica e Extensão Rural do Estado de Minas Gerais. Available online: [http://www.emater.mg.gov.br/portal.cgi?flagweb=novosite\\_pagina\\_interna&id=19167](http://www.emater.mg.gov.br/portal.cgi?flagweb=novosite_pagina_interna&id=19167) (accessed on 12 March 2020).

3. Acervo fundiário. INCRA - Instituto Nacional de Colonização e Reforma Agrária - INCRA. Available online: <<http://acervofundiario.incra.gov.br/acervo/acv.php>> (accessed on 12 March 2020).
4. Download de Dados Geográficos. Ministério do Meio Ambiente. Available online: <http://mapas.mma.gov.br/i3geo/datadownload.htm>
5. Reservas Particulares do Patrimônio Natural. ICMBio. Available online: <https://sistemas.icmbio.gov.br/simrppn/publico/>
6. INCRA. Available online: [https://certificacao.incra.gov.br/csv\\_shp/export\\_shp.py](https://certificacao.incra.gov.br/csv_shp/export_shp.py)
7. FUNAI – Fundação Nacional do Índio. Available online: <http://www.funai.gov.br/index.php/shape>
8. Massacres no Campo. CPT – Comissão Pastoral da Terra. Available online: <https://www.cptnacional.org.br/>
9. Map and Data Platform. MapBiomass. Available online: <https://mapbiomas.org/>
10. Dias Júnior, A.F.; Andrade, A.M.; Soares, V.W.; Costa Júnior, D.S.; Ferreira, D.H.A.A.; Leles, P.S.S. Potencial energético de sete materiais genéticos de Eucalyptus cultivados no Estado do Rio de Janeiro. *Sci. For.* **2015**, *43*, 833-843.
11. Mehta, P.S.; Anand, K. Estimation of a Lower Heating Value of Vegetable Oil and Biodiesel Fuel. *Energy Fuels* **2009**, *23*, 3893–3898.
12. Brasil. *Balanco Energético Nacional 2020*. MME: Brasília, Brazil, 2020.
13. Custo de Produção da Madeira de Eucalipto. IEMA – Instituto Energia e Meio Ambiente. Available online: [www.energiaeambiente.org.br](http://www.energiaeambiente.org.br) (accessed on 08 August 2019).
14. Alves, M.E.B.; Mantovani, E.C.; Sediya, G.C.; Neves, J.C.L. Estimate of the Crop Coefficient for Eucalyptus Cultivated under Irrigation During Initial Growth. *Cerne* **2013**, *19*, 247-253.
15. Vassallo, M.D. *Análise de impactos econômicos setoriais e regionais decorrentes de investimentos em infraestrutura de transportes*. Doctoral Thesis. Faculdade de Economia, Administração e Contabilidade. Universidade de São Paulo. 2015.
16. Forkenbrock, D.J. *External Costs of Truck and Rail Freight Transportation*. Public Policy Center, The University of Iowa. 1998.
17. Leite, C.E.; Pereira, L.R.S.; Marinho, C.J.M.; Bittencourt, J.A. Análise Comparativa Custos entre os Meios de Transporte Rodoviário e Ferroviário. *Congresso Nacional de Excelência em Gestão*, 2016.
18. Lemos, R. *Custos do Transporte Ferroviário*. Instituto Brasil Logístico: São Paulo. 2020.
